# Supplementary material for: The CarbonTracker Data Assimilation Shell (CTDAS) v1.0: implementation and global carbon balance 2001–2015
Source: Copernicus journal article supplement (doi:10.5194/gmd-10-2785-2017), 2017-07-18
Supplement: Supplementary file [file gmd-10-2785-2017-supplement-title-page.pdf › gmd-10-2785-2017-supplement-title-page.pdf]

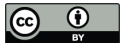

## *Supplement of*

# **The CarbonTracker Data Assimilation Shell (CTDAS) v1.0: implementation and global carbon balance 2001–2015**

**Ingrid T. van der Laan-Luijkx et al.**

*Correspondence to:* Ingrid van der Laan-Luijkx (ingrid.vanderlaan@wur.nl)

- gmd-10-2785-2017-supplement-title-page.pdf
- ctdas\_r1479
  - .project
  - .pydevproject
  - Makefile
  - clone\_ctdas.sh
  - da
    - \* \_\_init\_\_.py
    - \* \_\_init\_\_.pyc
    - \* analysis
    - \* baseclasses
    - \* bin
    - \* carbondioxide
    - \* co2gridded
    - \* doc
    - \* examples
    - \* methane
    - \* platform
    - \* rc
    - \* sf6
    - \* stilt
    - \* test
    - \* tm5
    - \* tools
  - go\_readrc
  - gpl-3.0.txt

- start\_ctdas.sh
- stilt.nc4.sib.co2.Feb.2015.May13.r
- template.jb
- template.py
- template.rc

The copyright of individual parts of the supplement might differ from the CC BY 3.0 License.
